# Supplementary material
Source: Springer Nature journal article supplement (https://www.springermedizin.de/resource/supplementary/12913_2007_519_MOESM1_ESM.pdf/9534932)

1. Respondents to questionnaires II and III
2. Respondents to the open-ended questions
3. Respondents with a comment about postnatal care
4. Respondents with a *negative* comment about postnatal care (study sample)

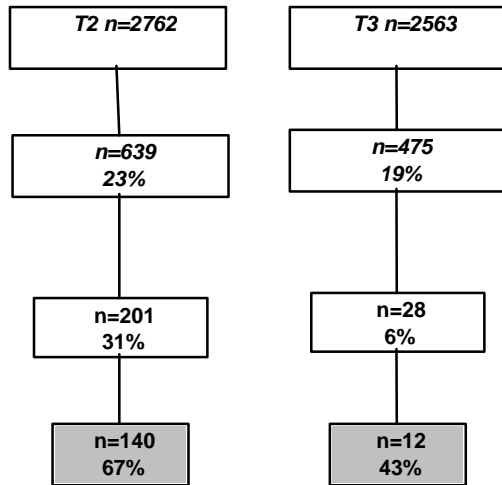

Supplement: MOESM1 [file 9534932]
